# Supplementary material
Source: publisher site journal article supplement (https://www.dovepress.com/article/413723)
Supplement: Supplementary file 1 [file get_supplementary_file.php]

**Supplement 1**

**Student questionnaire**

**Background data about the respondent**

Age

Sex?

1. Male
2. Woman
3. Do not want to specify?

Future profession?

1. Occupational therapist
2. Physiotherapist
3. Physician
4. Nurse

Do you have previous experience of communication exercises?

1. To a very small degree
2. To a small extent
3. partly
4. To a large extent
5. To a very high degree

*If yes, please give examples.*

Did you understand before the exercise that in the future you will have to practice your profession by telephone?

1. To a very small degree
2. To a small extent
3. Partly
4. To a large extent
5. To a very high degree

*If yes, please give examples.*

**Below are questions about Call the On-Call, the Interprofessional Telephone Communication Training at IPTW – SÖS. The questions relate to the "learning activity", not only the telephone conversation between the nursing student and the medical student, but the entire structure of the exercise, i.e., the work of the team and the interprofessional communication on the evening when the medical student leaves the department for on-call work.**

In the communication exercise(s), the following were used:

1. A simulated case Number:
2. A real case Number:
3. Both simulated cases and real cases

I perceive that through the learning activity I have developed knowledge and skills that are valuable for my own profession.

1. To a very small degree
2. To a small extent
3. Partly
4. To a large extent
5. To a very high degree

*Please elaborate on your answer.*

I perceive that through the learning activity I have gained knowledge about the competencies of other professions.

1. To a very small degree
2. To a small extent
3. Partly
4. To a large extent
5. To a very high degree

*Please elaborate on your answer.*

I perceive that the team has developed through the learning activity.

1. To a very small degree
2. To a small extent
3. Partly
4. To a large extent
5. To a very high degree

*Please elaborate on your answer.*

Was the purpose of the learning activity clear?

1. To a very small degree
2. To a small extent
3. Partly
4. To a large extent
5. To a very high degree

*Please elaborate on your answer.*

Did you feel that the learning activity was relevant in relation to KUA's learning outcomes?

1. To a very small degree
2. To a small extent
3. Partly
4. To a large extent
5. To a very high degree

*Please elaborate on your answer.*

Did you get the support you needed from the team on the evening of the communication exercise?

1. To a very small degree
2. To a small extent
3. Partly
4. To a large extent
5. To a very high degree

*Please elaborate on your answer.*

Were the team members' skills utilised in telephone communication?

1. To a very small degree
2. To a small extent
3. Partly
4. To a large extent
5. To a very high degree

*Please elaborate on your answer.*

Was the team's work affected by the team members not being in the same location?

1. To a very small degree
2. To a small extent
3. Partly
4. To a large extent
5. To a very high degree

*Please elaborate on your answer.*

What were the strengths of teacher activity?

What were the weaknesses of the learning activity?

What can be improved?

Other reflections?

**Supervisor questionnaire**

**Background data about the respondent**

Sex?

1. Male
2. Woman
3. Do not want to specify?

Profession?

1. Occupational therapist
2. Physiotherapist
3. Physician
4. Nurse

I perceive that the students through the learning activity developed knowledge and skills valuable for their own profession.

1. To a very small degree
2. To a small extent
3. Partly
4. To a large extent
5. To a very high degree

*Please elaborate on your answer.*

I perceive that the students through the learning activity developed their interprofessional competence.

1. To a very small degree
2. To a small extent
3. Partly
4. To a large extent
5. To a very high degree

*Please elaborate on your answer.*

I perceive that the students gain knowledge about their own and other professions' work situation and difficulties during on-call hours.

1. To a very small degree
2. To a small extent
3. Partly
4. To a large extent
5. To a very high degree

*Please elaborate on your answer.*

I perceive that the team developed through this learning activity.

1. To a very small degree
2. To a small extent
3. Partly
4. To a large extent
5. To a very high degree

*Please elaborate on your answer.*

How did the learning activity affect your work as a supervisor at the IPTW?

1. To a very small degree
2. To a small extent
3. Partly
4. To a large extent
5. To a very high degree

*Please elaborate on your answer.*

Other reflections?
